# Supplementary material for: Triggering the phase transition and capacity enhancement of Nb2O5 for fast-charging lithium-ion storage
Source: Royal Society of Chemistry journal article supplement (doi:10.1039/d1ta00558h), 2021-01-01
Supplement: d1ta00558h1.pdf [file d1ta00558h1.pdf]

## Electronic Supplementary Information

# Triggering Phase Transition and Capacity Enhancement of Nb<sub>2</sub>O<sub>5</sub> for Fast-Charging Lithium-ion Storage

Fei Shen,<sup>1,2,5</sup> Zhongti Sun,<sup>1,2,5</sup> Liang Zhao,<sup>1,5</sup> Yuanhua Xia,<sup>3,5</sup> Yanyan Shao,<sup>1,2</sup>,  
Jingsheng Cai,<sup>1,2</sup> Shuo Li,<sup>1,2</sup> Chen Lu,<sup>1,2</sup> Xiaoling Tong,<sup>1,2</sup> Yu Zhao,<sup>1,2</sup> Jingyu Sun,<sup>1,2,4</sup>  
Yuanlong Shao<sup>1,2,4\*</sup>

<sup>1</sup>College of Energy, Soochow Institute for Energy and Materials InnovationS (SIEMIS),  
Jiangsu Provincial Key Laboratory for Advanced Carbon Materials and Wearable  
Energy Technologies, Soochow University, 215006 Suzhou, P. R. China

<sup>2</sup>SUDA-BGI Collaborative Innovation Center, Soochow University, Suzhou 215006, P.  
R. China.

<sup>3</sup>Key Laboratory of Neutron Physics, Institute of Nuclear Physics and Chemistry, China  
Academy of Engineering Physics, Mianyang 621999, People's Republic of China

<sup>4</sup>Beijing Graphene Institute (BGI), 100095 Beijing, P. R. China

<sup>5</sup>These authors contributed equally.

**\*CORRESPONDING AUTHOR NOTE:**

Prof. Yuanlong Shao, E-mail: [ylshao@suda.edu.cn](mailto:ylshao@suda.edu.cn)

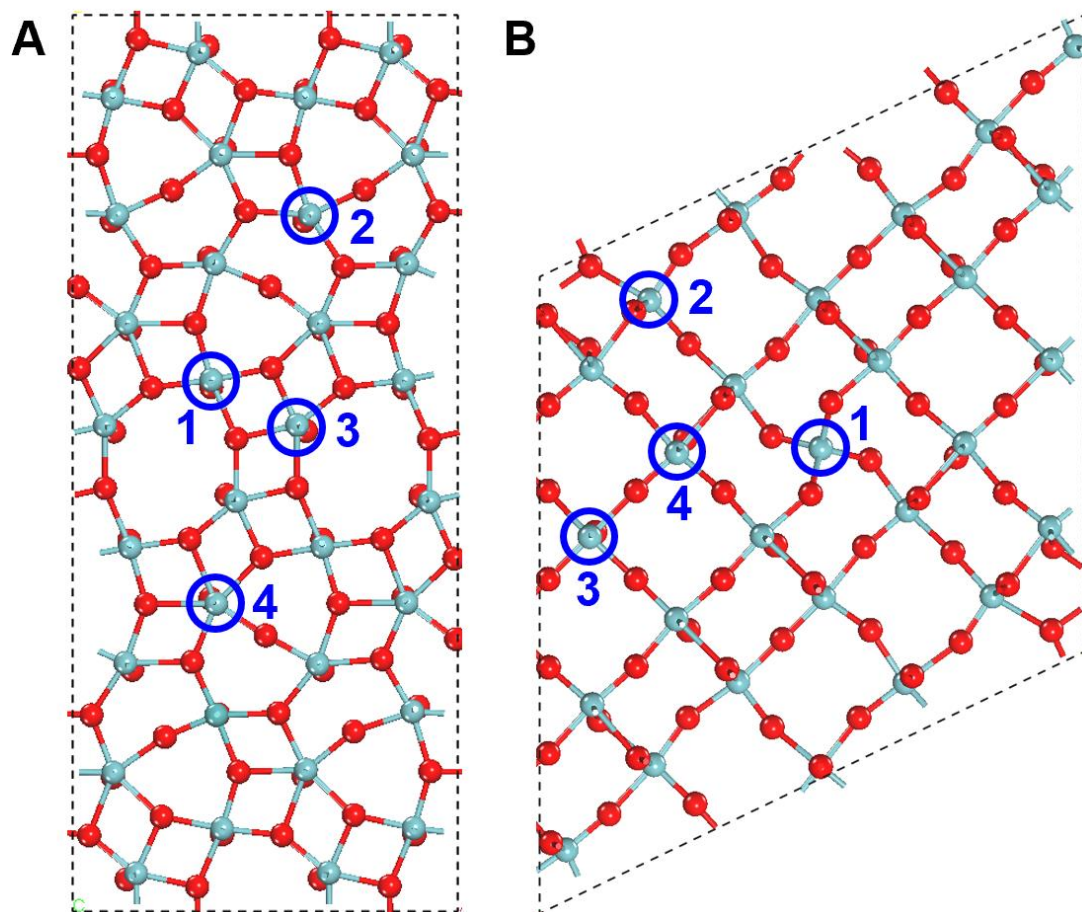

Fig. S1. The possible substituting sites for Mo, marked as “1, 2, 3, 4” for the T phase with periodically repeating  $(2\times 1\times 1)$  supercell A and H phase unit cell B, respectively. For the T- $\text{Nb}_2\text{O}_5$  phase, “1” configuration is lower than “2”, “3”, “4” site models by 0.06, 0.13 and 0.33 eV, respectively. For the H- $\text{Nb}_2\text{O}_5$  phase, “1” site owns the lowest energy among others by 0.7 eV for “2” and “3” site, by 0.74 eV for “4” locations.

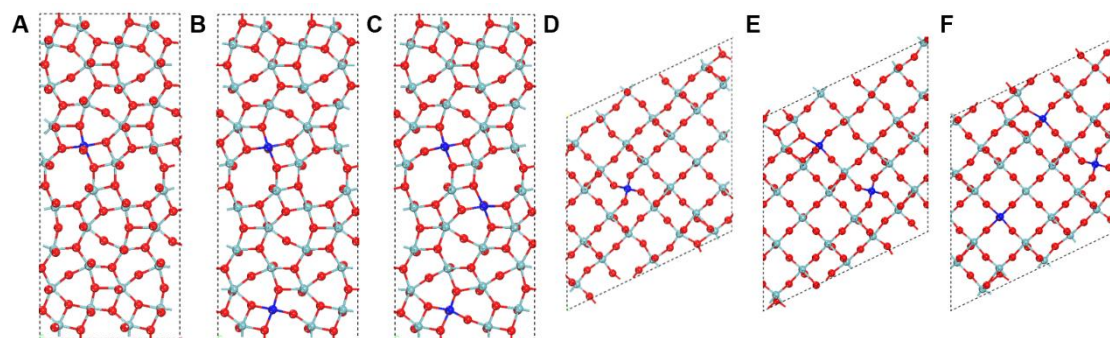

Fig. S2. The possible configurations with ratios of Mo/Nb of 0.032 A 0.067 B and 0.010 C in the T phase; with ratios of Mo/Nb of 0.040 D, 0.077 E and 0.120 F in the H phase. Light blue, blue, and red balls indicate Nb, Mo, and O atoms, respectively.

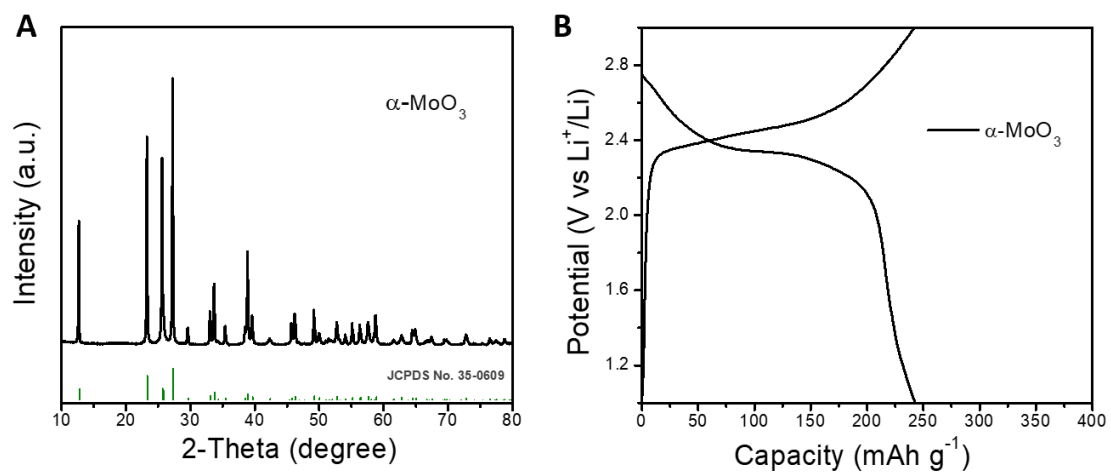

Fig. S3. A, XRD pattern of  $\alpha$ - $\text{MoO}_3$ , and B, charge/discharge curves of  $\alpha$ - $\text{MoO}_3$ /Li half cell.

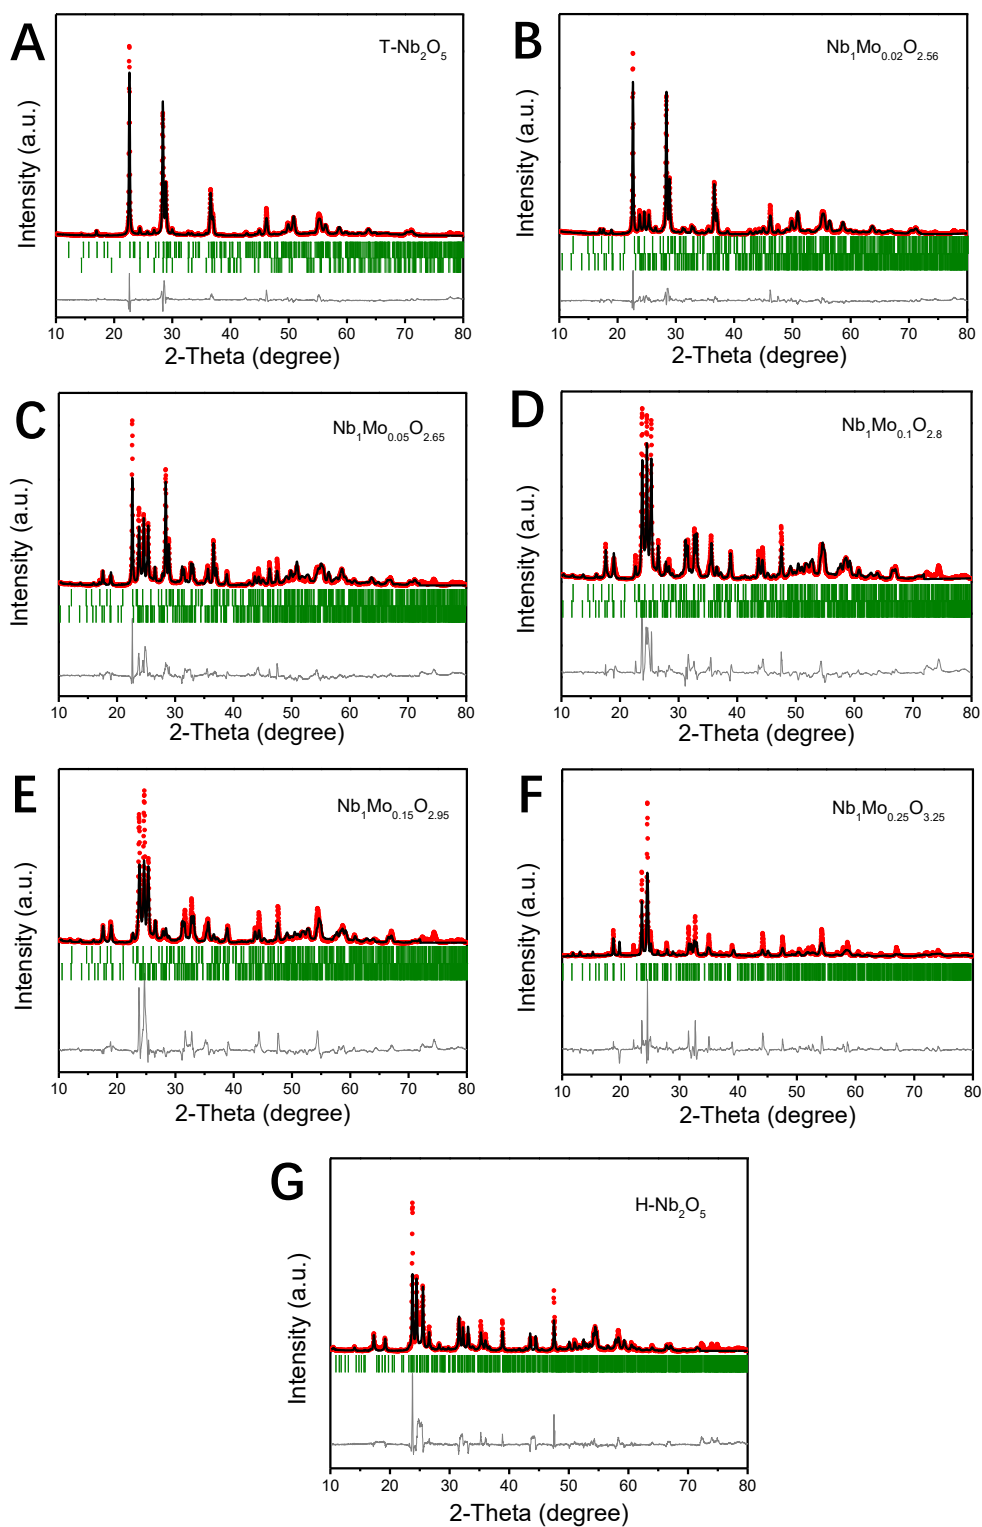

Fig. S4. XRD patterns for A, T-Nb<sub>2</sub>O<sub>5</sub>, B, Nb<sub>1</sub>Mo<sub>0.02</sub>O<sub>2.56</sub>, C, Nb<sub>1</sub>Mo<sub>0.05</sub>O<sub>2.65</sub>, D, Nb<sub>1</sub>Mo<sub>0.10</sub>O<sub>2.80</sub>, E, Nb<sub>1</sub>Mo<sub>0.15</sub>O<sub>2.95</sub>, F, Nb<sub>1</sub>Mo<sub>0.25</sub>O<sub>3.25</sub> and G, H-Nb<sub>2</sub>O<sub>5</sub>.

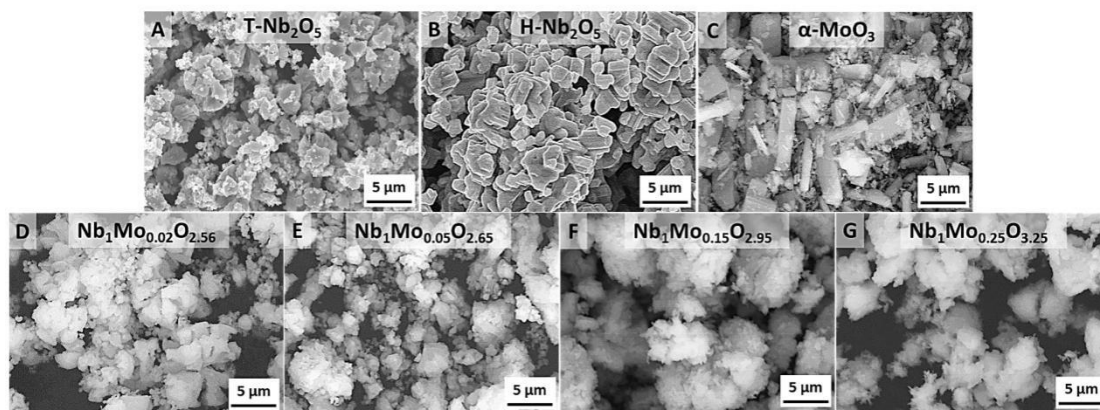

Fig. S5. SEM images of A, T-Nb<sub>2</sub>O<sub>5</sub>, B, H-Nb<sub>2</sub>O<sub>5</sub>, C, α-MoO<sub>3</sub>, D, Nb<sub>1</sub>Mo<sub>0.02</sub>O<sub>2.56</sub>, E, Nb<sub>1</sub>Mo<sub>0.05</sub>O<sub>2.65</sub>, F, Nb<sub>1</sub>Mo<sub>0.15</sub>O<sub>2.95</sub>, and G, Nb<sub>1</sub>Mo<sub>0.25</sub>O<sub>3.25</sub>.

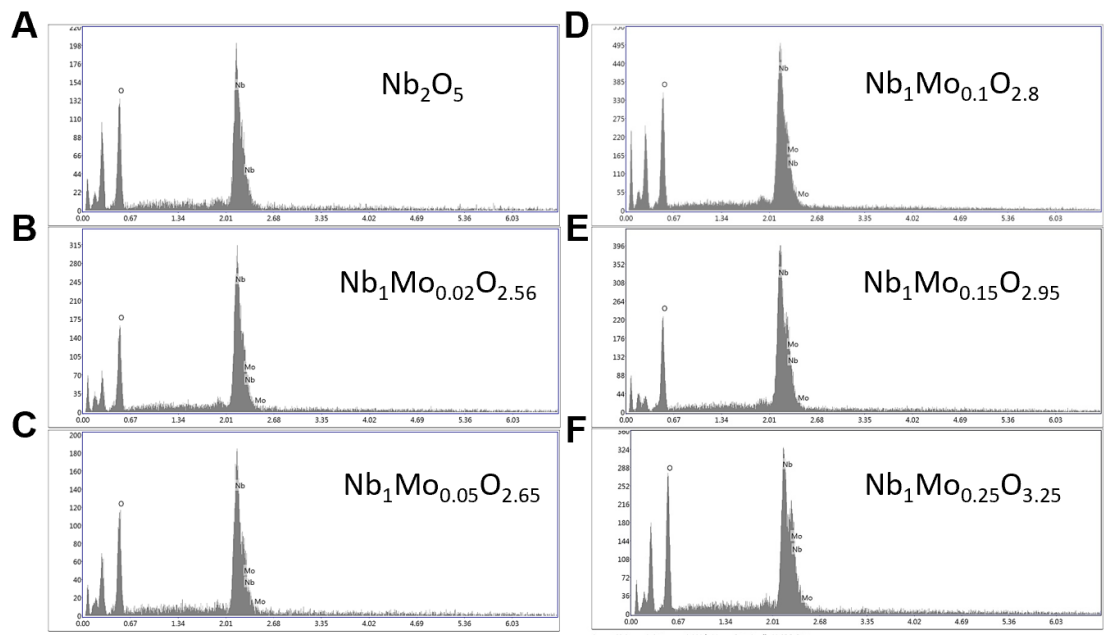

Fig. S6. EDX of as-prepared A,  $\text{Nb}_2\text{O}_5$ , B,  $\text{Nb}_1\text{Mo}_{0.02}\text{O}_{2.56}$ , C,  $\text{Nb}_1\text{Mo}_{0.05}\text{O}_{2.65}$ , D,  $\text{Nb}_1\text{Mo}_{0.15}\text{O}_{2.95}$ , E,  $\text{Nb}_1\text{Mo}_{0.25}\text{O}_{3.25}$ , and F,  $\text{MoO}_3$ .

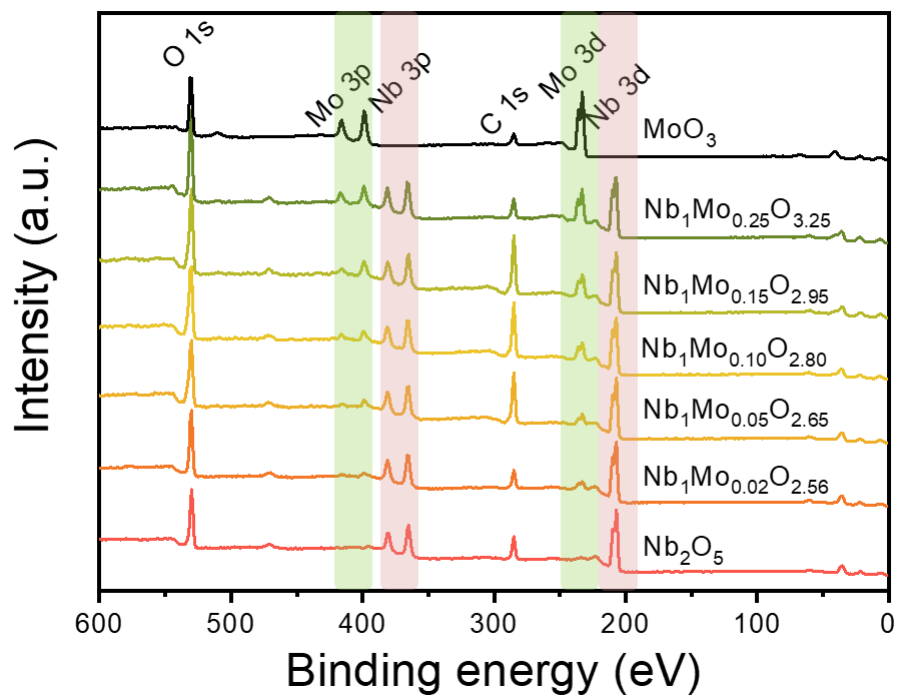

Fig. S7. XPS spectra of Nb<sub>2</sub>O<sub>5</sub>, Nb<sub>1</sub>Mo<sub>0.02</sub>O<sub>2.56</sub>, Nb<sub>1</sub>Mo<sub>0.05</sub>O<sub>2.65</sub>, Nb<sub>1</sub>Mo<sub>0.15</sub>O<sub>2.95</sub>, Nb<sub>1</sub>Mo<sub>0.25</sub>O<sub>3.25</sub>, and MoO<sub>3</sub>.



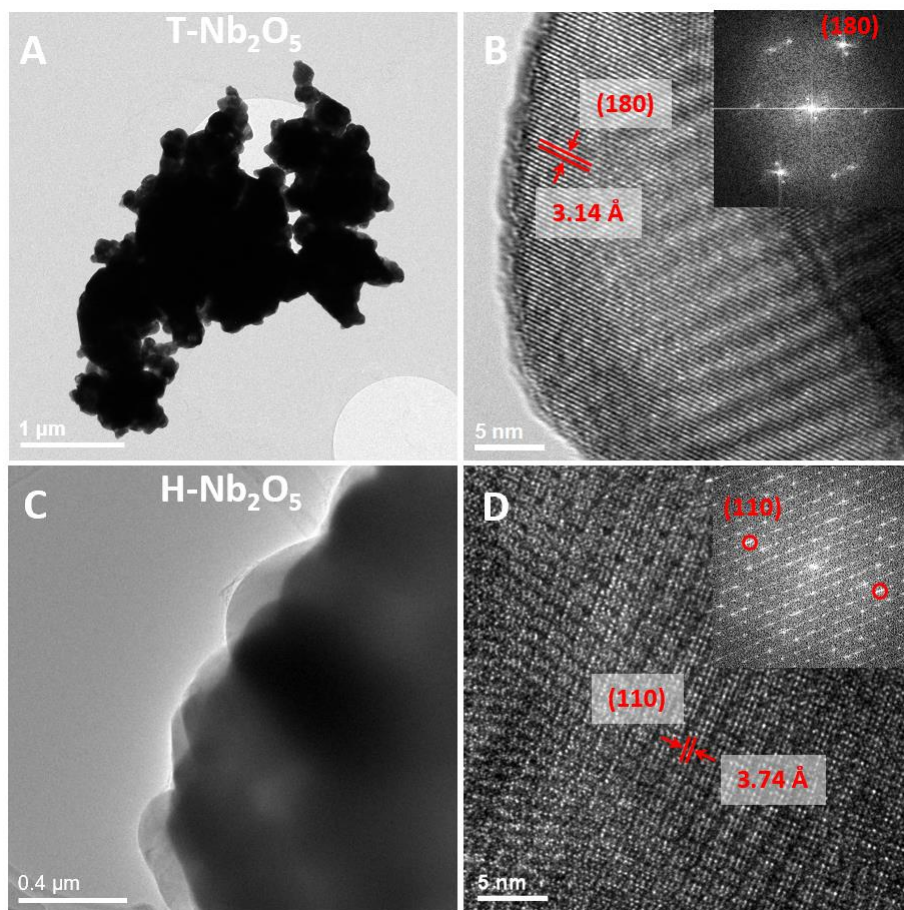

Fig. S8. TEM images of A-B, T- Nb<sub>2</sub>O<sub>5</sub> and C-D, H-Nb<sub>2</sub>O<sub>5</sub>.

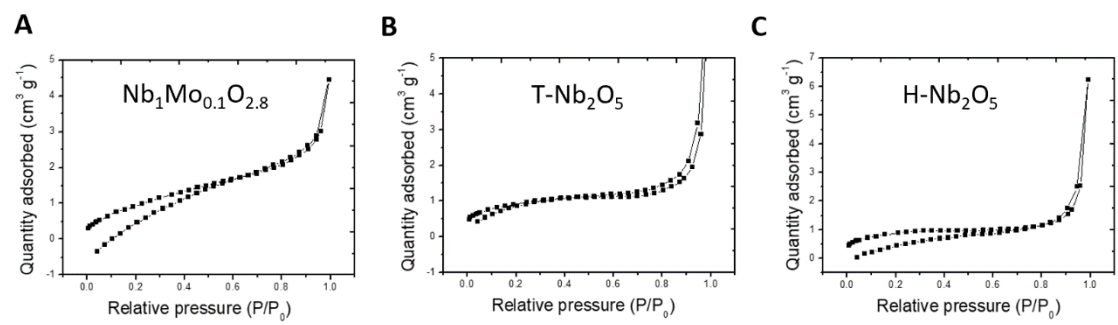

Fig. S9. BET results of A, Nb<sub>1</sub>Mo<sub>0.1</sub>O<sub>2.8</sub>, B, T-Nb<sub>2</sub>O<sub>5</sub> and C, H-Nb<sub>2</sub>O<sub>5</sub>.

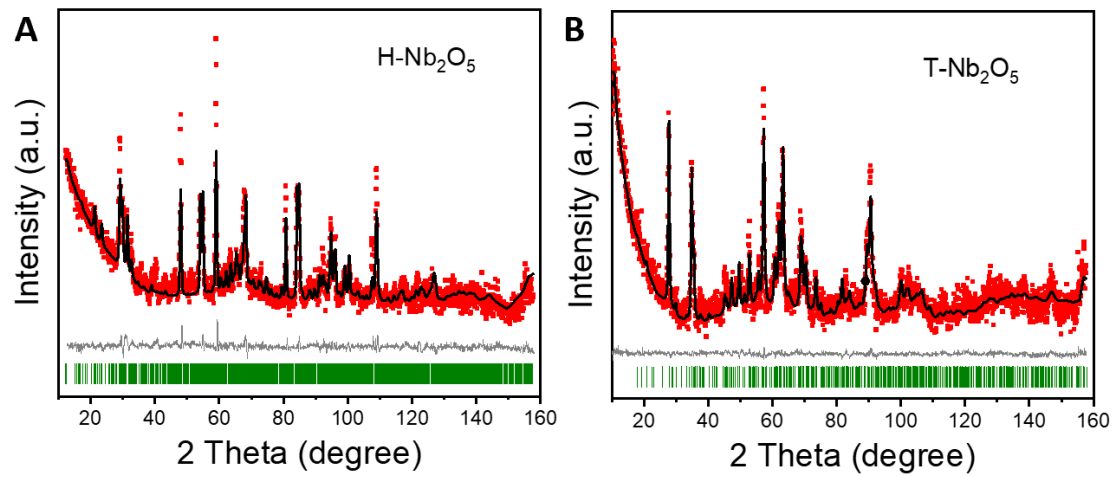

Fig. S10. The neutron powder diffraction patterns of A, H-Nb<sub>2</sub>O<sub>5</sub> and B, T-Nb<sub>2</sub>O<sub>5</sub>.

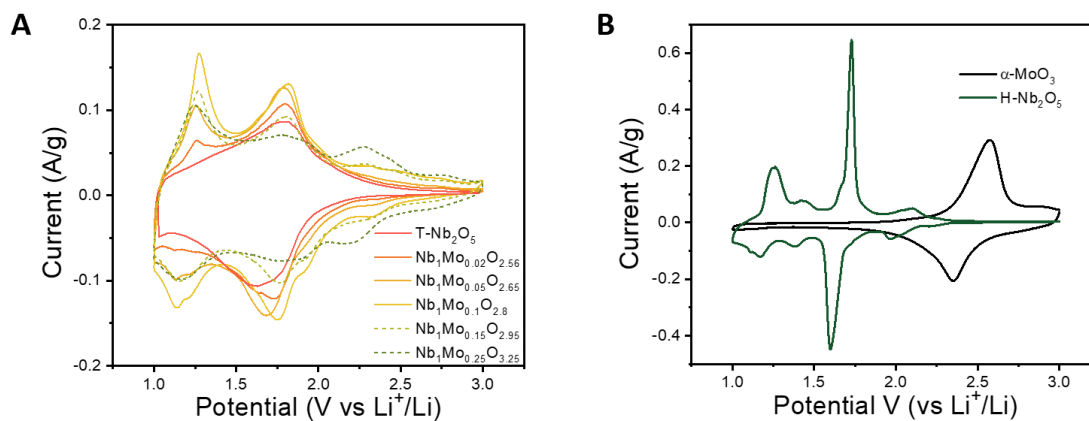

Fig. S11. A, CVs of T-Nb<sub>2</sub>O<sub>5</sub>, Nb<sub>1</sub>Mo<sub>0.02</sub>O<sub>2.56</sub>, Nb<sub>1</sub>Mo<sub>0.05</sub>O<sub>2.65</sub>, Nb<sub>1</sub>Mo<sub>0.1</sub>O<sub>2.8</sub>, Nb<sub>1</sub>Mo<sub>0.15</sub>O<sub>2.95</sub>, Nb<sub>1</sub>Mo<sub>0.25</sub>O<sub>3.25</sub>. B, CVs of α-MoO<sub>3</sub> and H-Nb<sub>2</sub>O<sub>5</sub>.

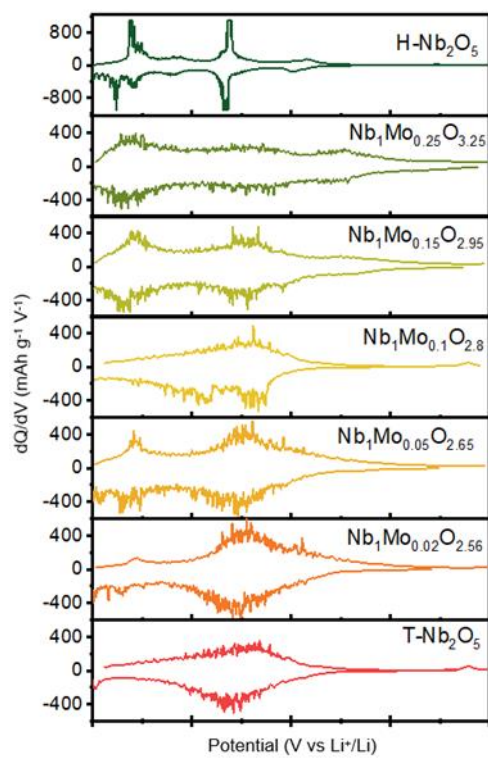

Fig. S12. The corresponding  $dQ/dV$  plots of  $\text{Nb}_2\text{O}_5$  and Mo mixed  $\text{Nb}_2\text{O}_5$  compounds.

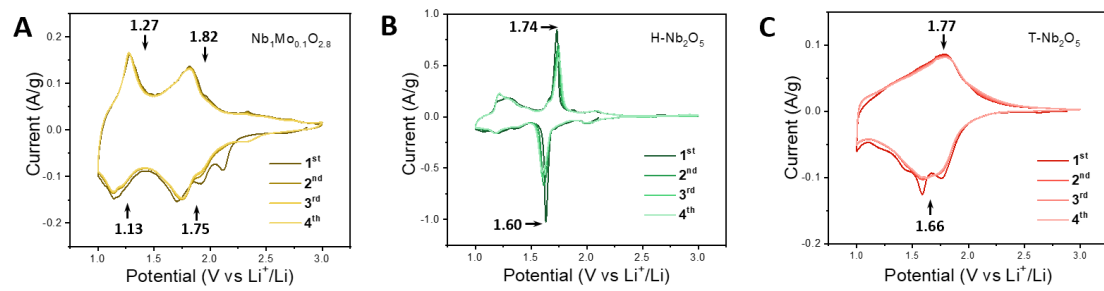

Fig. S13. First four-scan CVs of A,  $\text{Nb}_1\text{Mo}_{0.1}\text{O}_{2.8}$ , B,  $\text{H-Nb}_2\text{O}_5$  and C,  $\text{T-Nb}_2\text{O}_5$ .

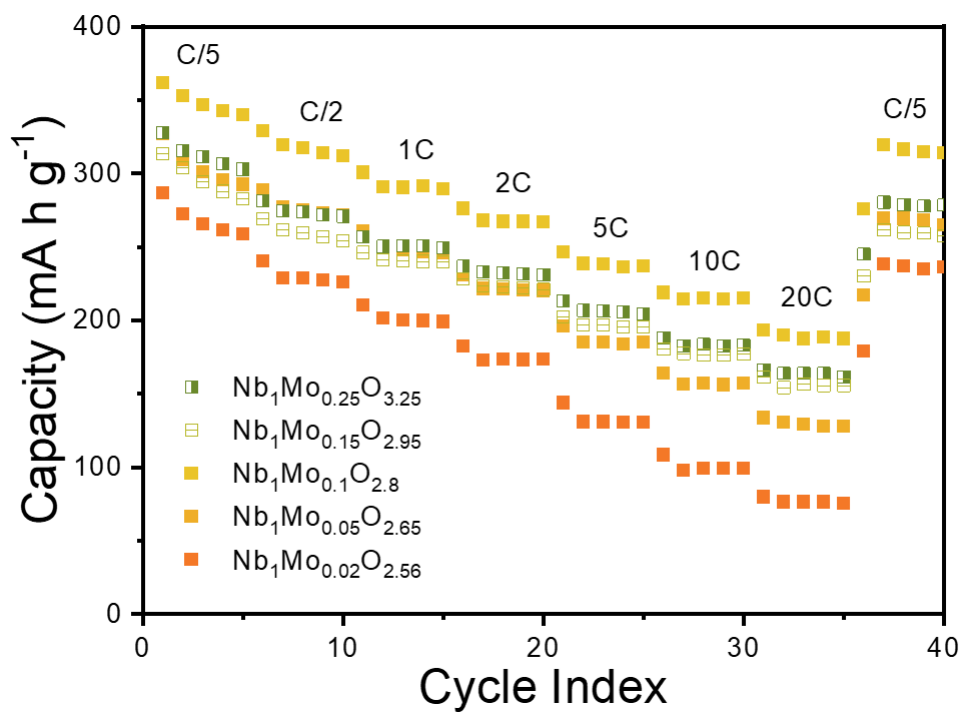

Fig. S14. Rate performance of  $\text{Nb}_1\text{Mo}_{0.02}\text{O}_{2.56}$ ,  $\text{Nb}_1\text{Mo}_{0.05}\text{O}_{2.65}$ ,  $\text{Nb}_1\text{Mo}_{0.1}\text{O}_{2.8}$ ,  $\text{Nb}_1\text{Mo}_{0.15}\text{O}_{2.95}$ , and  $\text{Nb}_1\text{Mo}_{0.25}\text{O}_{3.25}$ .

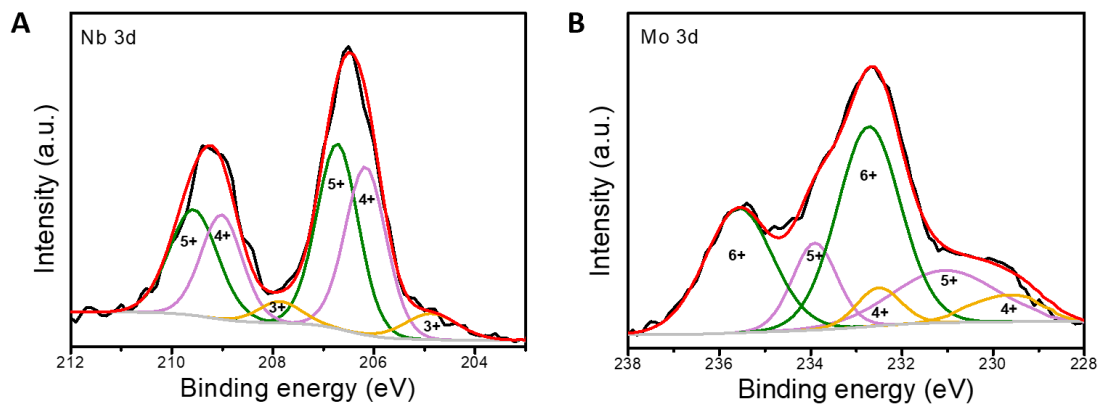

Fig. S15. Ex situ XPS spectra for A, Nb<sub>3d</sub> and B, Mo<sub>3d</sub> of Nb<sub>1</sub>Mo<sub>0.1</sub>O<sub>2.8</sub>.



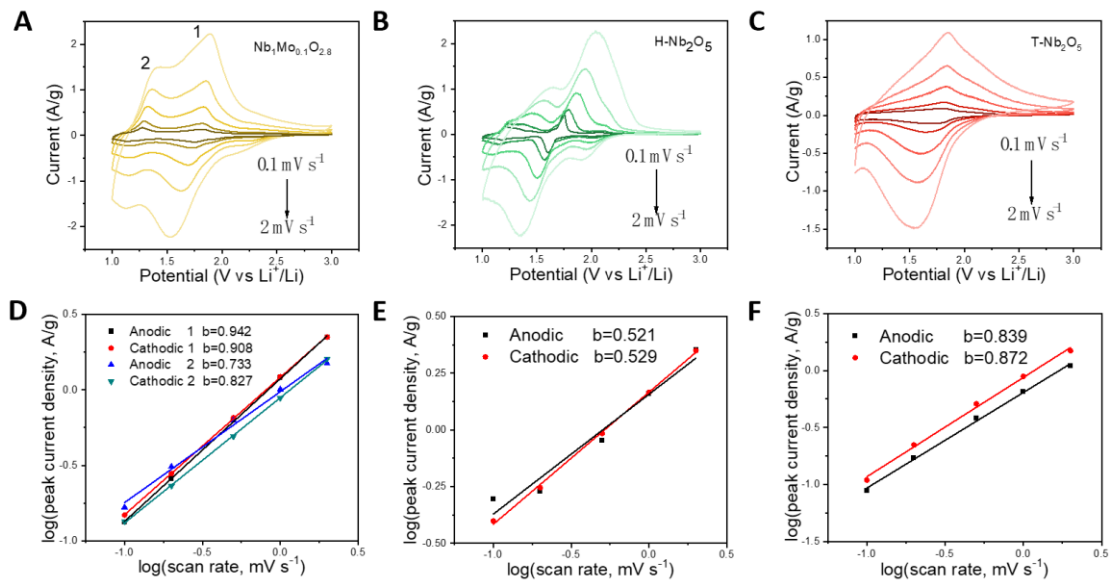

Fig. S16. CVs for A, Nb<sub>1</sub>Mo<sub>0.1</sub>O<sub>2.8</sub>, B, H- Nb<sub>2</sub>O<sub>5</sub> and C, T-Nb<sub>2</sub>O<sub>5</sub>. b value for D, Nb<sub>1</sub>Mo<sub>0.1</sub>O<sub>2.8</sub>, E, H- Nb<sub>2</sub>O<sub>5</sub> and F, T-Nb<sub>2</sub>O<sub>5</sub>.

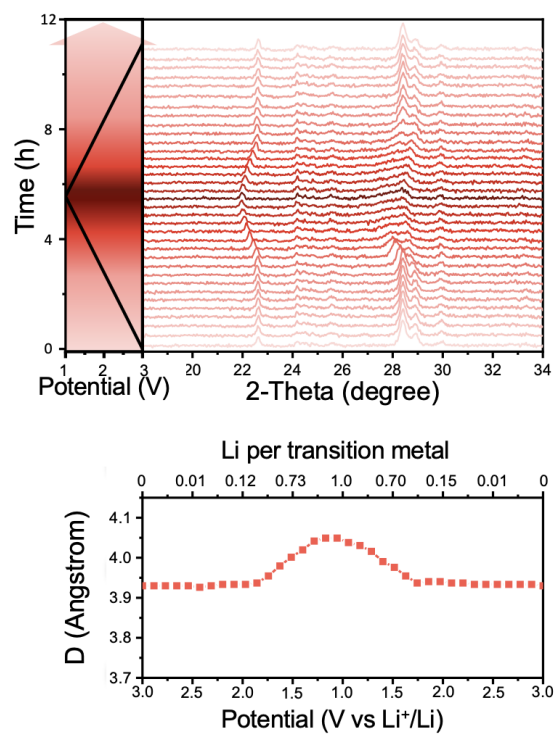

Fig. S17. *In situ* XRD test of T-Nb<sub>2</sub>O<sub>5</sub> to demonstrate the structural evolution upon (de)lithiation process recorded accompanied by the cyclic voltammetry measurement at 0.1 mV s<sup>-1</sup>. The lattice spacing change of the (001) plane during the in situ XRD measurement.

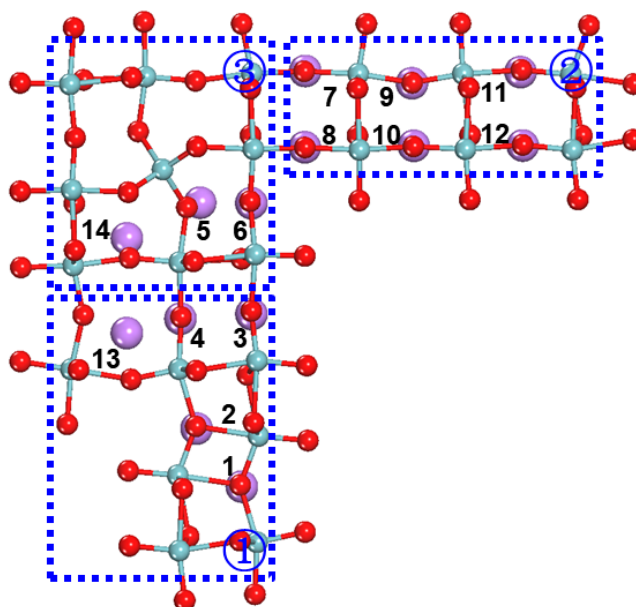

Fig. S18. Structure of lithiated H-Nb<sub>2</sub>O<sub>5</sub> along edge-shared NbO<sub>6</sub> octahedron linked by NbO<sub>4</sub> tetrahedron after geometry optimization. The 14 embedded Li atoms in the mentioned above configuration are labeled, and divided into three regions, marked as “①, ②, ③”. Green, red, and purple indicates Nb, O, and Li atom, respectively.

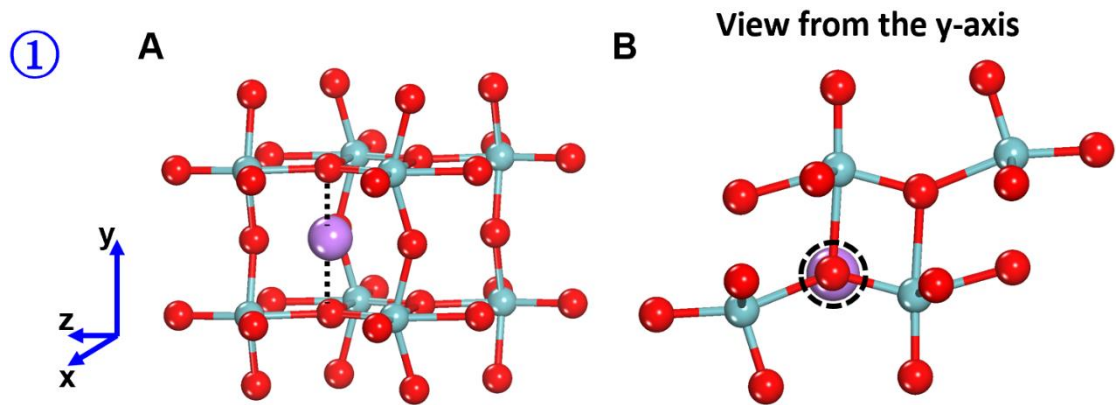

Fig. S19. A, Local bonding structure of an implanting Li atom and its neighboring atomic coordination in region “①”. The bridging coordination between Li atom and  $O_{2e}$  is highlighted with purple dashed lines. B, Local bonding structure viewed from the y-axis. The Li bridged  $O_{2e}$  is marked with a purple dashed circle. Green, red, and purple represents Nb, O, and Li atom, respectively.

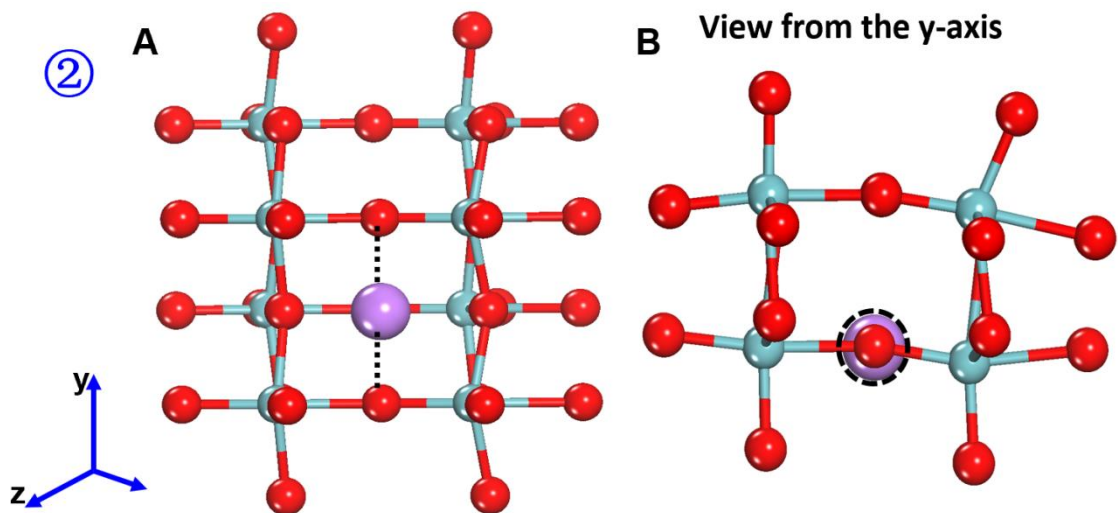

Fig. S20. A, Local bonding structure of an implanting Li atom and its neighboring atomic coordination in region “②”. The bridging coordination between Li atom and  $O_{2e}$  is highlighted with purple dashed lines. B, Local bonding structure viewed from the y-axis. The Li bridged  $O_{2e}$  is marked with a purple dashed circle. Green, red, and purple represents Nb, O, and Li atom, respectively.

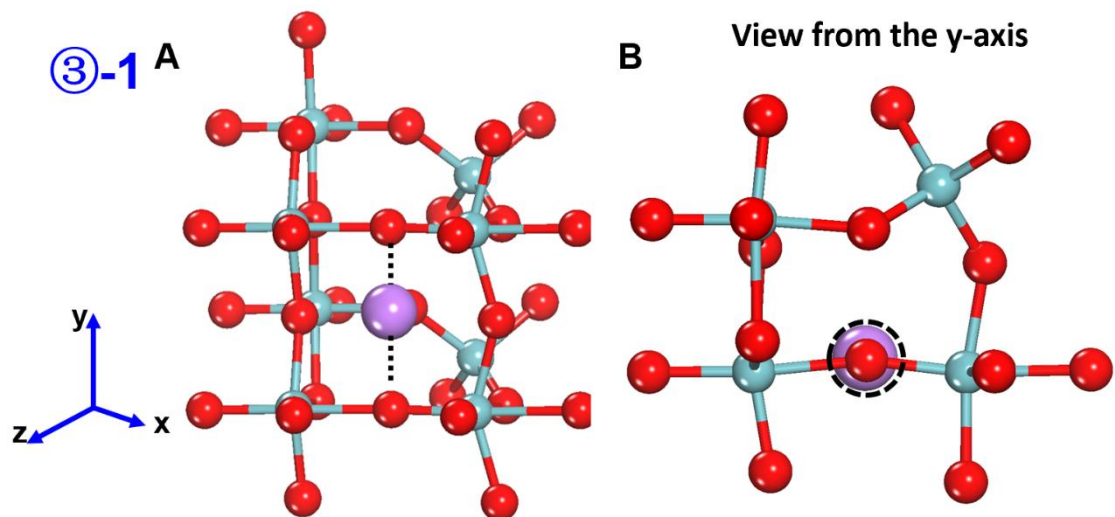

Fig. S21. A, Local bonding structure of an implanting Li atom and its neighboring atomic coordination in region “③”. The bridging coordination between Li atom and  $O_{2e}$  is highlighted with purple dashed lines. B, Local bonding structure viewed from the y-axis. The Li bridged  $O_{2e}$  is marked with a purple dashed circle. Green, red, and purple represents Nb, O, and Li atom, respectively.

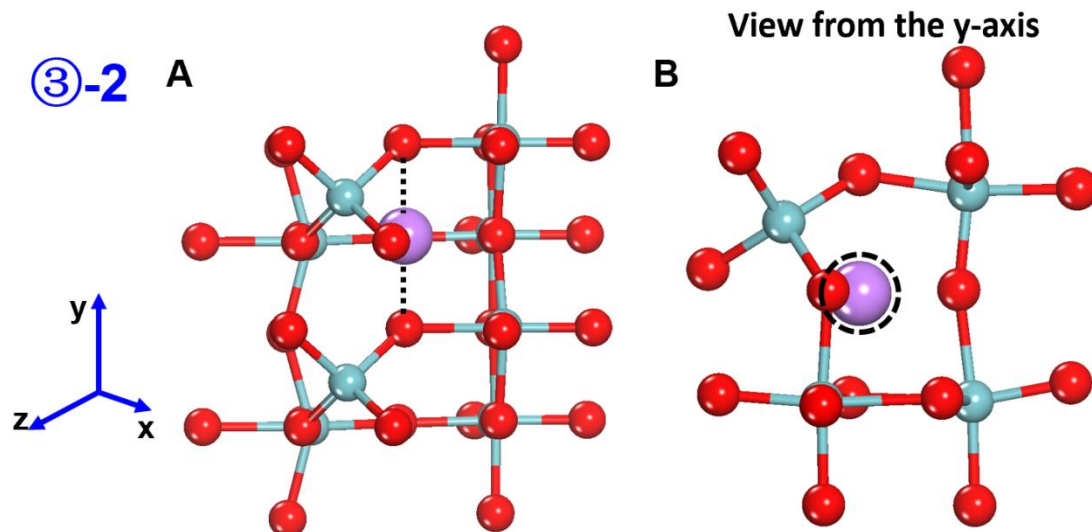

Fig. S22. A, Local bonding structure of an implanting Li atom and its neighboring atomic coordination in region “③”. The bridging coordination between Li atom and  $O_{2e}$  is highlighted with purple dashed lines. B, Local bonding structure viewed from the y-axis. The Li bridged  $O_{2e}$  is marked with a purple dashed circle. Green, red, and purple represents Nb, O, and Li atom, respectively.

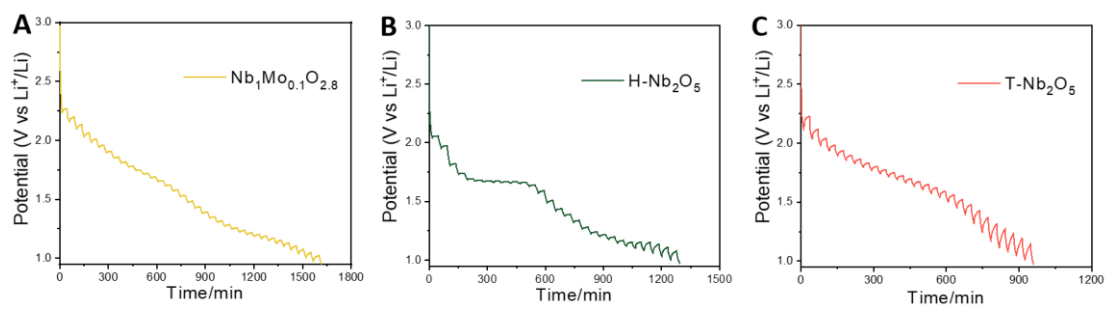

Fig. S23. GITT tests for A,  $\text{Nb}_1\text{Mo}_{0.1}\text{O}_{2.8}$ , B,  $\text{H-Nb}_2\text{O}_5$ , and C,  $\text{T-Nb}_2\text{O}_5$ .



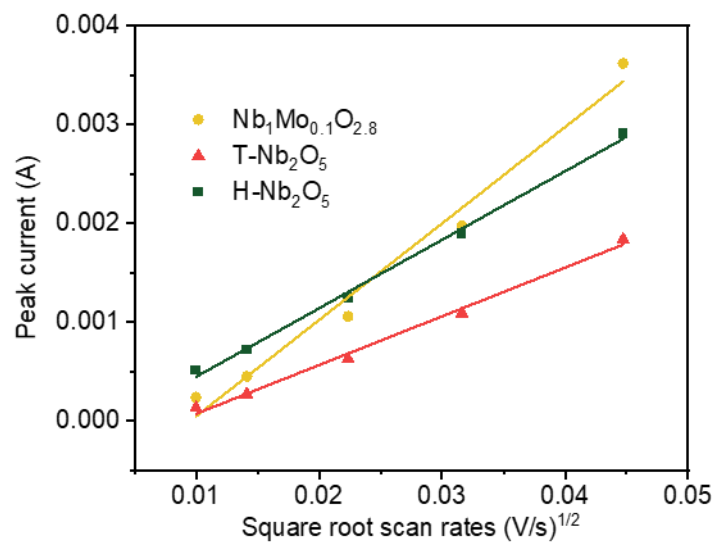

Fig. S24. The corresponding relation between the peak current and scan rate of T-and H-Nb<sub>2</sub>O<sub>5</sub> and Nb<sub>1</sub>Mo<sub>0.1</sub>O<sub>2.8</sub> compounds. According to the Randles-Sevcik equation, the calculated diffusion coefficients were  $1.53 \times 10^{-10}$  (Nb<sub>1</sub>Mo<sub>0.1</sub>O<sub>2.8</sub>),  $1.88 \times 10^{-10}$  (T-Nb<sub>2</sub>O<sub>5</sub>) and  $1.33 \times 10^{-10}$  (H-Nb<sub>2</sub>O<sub>5</sub>) cm<sup>2</sup> s<sup>-1</sup>, showing a similar trend as the values obtained from GITT analysis.

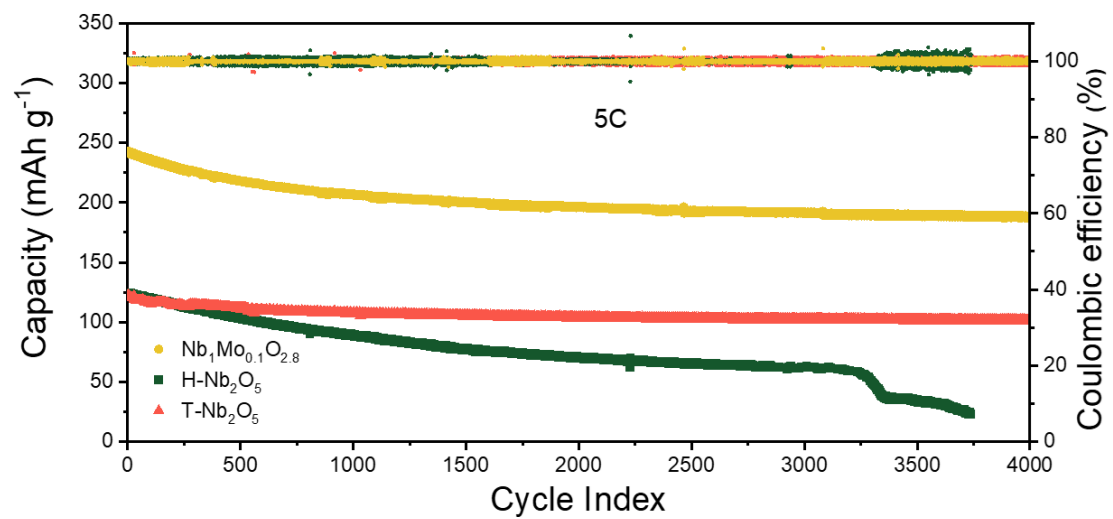

Fig. S25. Cycling stability of  $\text{Nb}_1\text{Mo}_{0.1}\text{O}_{2.8}$ , H- and T- $\text{Nb}_2\text{O}_5$ .

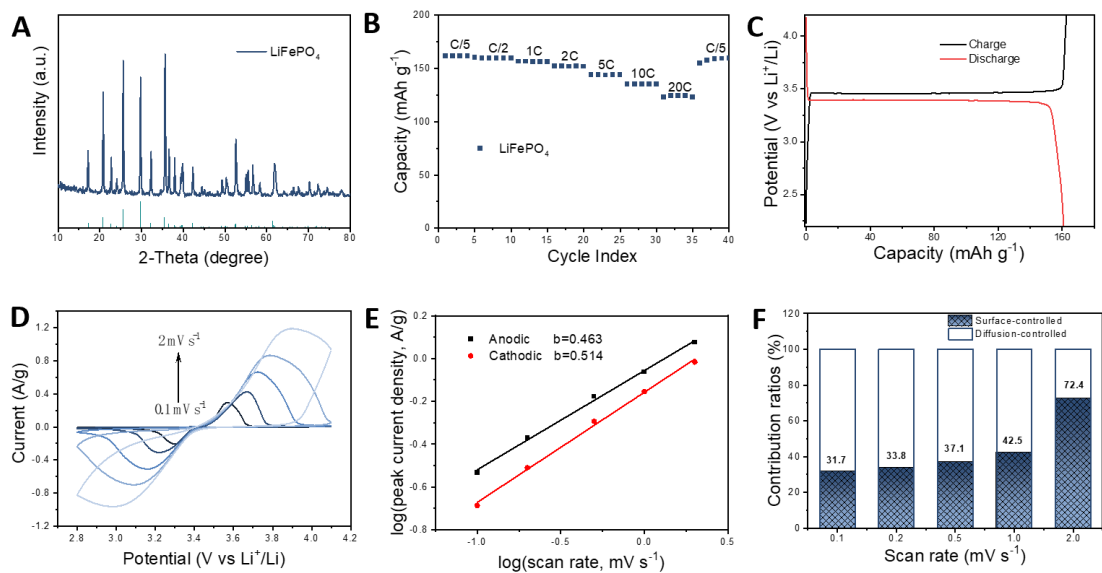

Fig. S26. A, XRD of  $\text{LiFePO}_4$ . B, Rate performance, C, charge/discharge curves, D, CV curves, E, b value, and F, the capacitance contribution of  $\text{LiFePO}_4//\text{Li}$  half-cell.

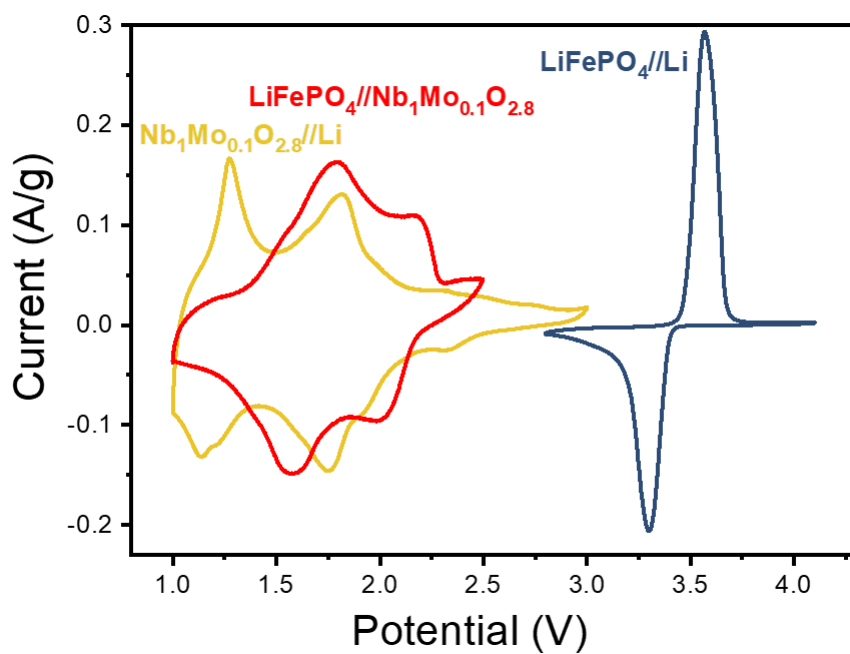

Fig. S27. CVs of  $\text{LiFePO}_4//\text{Li}$ ,  $\text{Nb}_1\text{Mo}_{0.1}\text{O}_{2.8}//\text{Li}$  half cell and  $\text{LiFePO}_4//\text{Nb}_1\text{Mo}_{0.1}\text{O}_{2.8}$  full cell.

Table S1. Atomic ratios obtained from EDX spectra.

| Materials                                            | Element | Weight % | Atomic % | Net Int. | Error % |
|------------------------------------------------------|---------|----------|----------|----------|---------|
| Nb <sub>2</sub> O <sub>5</sub>                       | O K     | 38.67    | 78.55    | 18.80    | 12.77   |
|                                                      | Nb L    | 61.33    | 21.45    | 38.20    | 6.54    |
| Nb <sub>1</sub> Mo <sub>0.02</sub> O <sub>2.56</sub> | O K     | 33.77    | 74.77    | 16.70    | 12.73   |
|                                                      | Nb L    | 64.58    | 24.62    | 43.90    | 5.61    |
|                                                      | Mo L    | 1.64     | 0.61     | 1.00     | 61.24   |
| Nb <sub>1</sub> Mo <sub>0.05</sub> O <sub>2.65</sub> | O K     | 36.94    | 77.32    | 19.50    | 13.03   |
|                                                      | Nb L    | 58.48    | 21.08    | 40.50    | 6.76    |
|                                                      | Mo L    | 4.58     | 1.60     | 2.90     | 35.96   |
| Nb <sub>1</sub> Mo <sub>0.1</sub> O <sub>2.8</sub>   | O K     | 27.55    | 68.89    | 8.70     | 10.72   |
|                                                      | Nb L    | 66.16    | 28.49    | 19.10    | 4.71    |
|                                                      | Mo L    | 6.29     | 2.62     | 1.70     | 17.31   |
| Nb <sub>1</sub> Mo <sub>0.15</sub> O <sub>2.95</sub> | O K     | 31.58    | 72.91    | 15.20    | 12.20   |
|                                                      | Nb L    | 59.62    | 23.70    | 40.90    | 5.06    |
|                                                      | Mo L    | 8.80     | 3.39     | 5.40     | 14.07   |
| Nb <sub>1</sub> Mo <sub>0.25</sub> O <sub>3.25</sub> | O K     | 37.75    | 78.01    | 19.70    | 11.63   |
|                                                      | Nb L    | 48.07    | 17.10    | 32.70    | 5.63    |
|                                                      | Mo L    | 14.18    | 4.89     | 8.80     | 10.49   |

Table S2. Refinement results of Nb<sub>2</sub>O<sub>5</sub> with various Mo amount, including the structure data, phase fractions, errors and quality of fit factor.

|                                                      | Structure data                                                      | T Phase<br>Fraction (%) | B Phase<br>Fraction (%) | H Phase<br>Fraction (%) | Rwp  |
|------------------------------------------------------|---------------------------------------------------------------------|-------------------------|-------------------------|-------------------------|------|
| T-Nb <sub>2</sub> O <sub>5</sub>                     | T-Nb <sub>2</sub> O <sub>5</sub> , B-Nb <sub>2</sub> O <sub>5</sub> | 96.16 (1.08)            | 3.84 (0.14)             |                         | 16.0 |
| Nb <sub>1</sub> Mo <sub>0.02</sub> O <sub>2.56</sub> | T-Nb <sub>2</sub> O <sub>5</sub> , H-Nb <sub>2</sub> O <sub>5</sub> | 84.09 (0.92)            |                         | 15.91 (0.24)            | 15.9 |
| Nb <sub>1</sub> Mo <sub>0.05</sub> O <sub>2.65</sub> | T-Nb <sub>2</sub> O <sub>5</sub> , H-Nb <sub>2</sub> O <sub>5</sub> | 54.18 (1.15)            |                         | 45.82 (0.73)            | 23.9 |
| Nb <sub>1</sub> Mo <sub>0.10</sub> O <sub>2.80</sub> | T-Nb <sub>2</sub> O <sub>5</sub> , H-Nb <sub>2</sub> O <sub>5</sub> | 4.43 (0.33)             |                         | 95.57 (1.09)            | 26.0 |
| Nb <sub>1</sub> Mo <sub>0.15</sub> O <sub>2.95</sub> | T-Nb <sub>2</sub> O <sub>5</sub> , H-Nb <sub>2</sub> O <sub>5</sub> | 7.43 (0.07)             |                         | 92.57 (1.35)            | 33.4 |
| Nb <sub>1</sub> Mo <sub>0.25</sub> O <sub>3.25</sub> | T-Nb <sub>2</sub> O <sub>5</sub> , H-Nb <sub>2</sub> O <sub>5</sub> |                         |                         | 100 (0.06)              | 45.2 |
| H-Nb <sub>2</sub> O <sub>5</sub>                     | H-Nb <sub>2</sub> O <sub>5</sub>                                    |                         |                         | 100 (2.55)              | 32.9 |

Table S3. BET surface area of Nb<sub>1</sub>Mo<sub>0.1</sub>O<sub>2.8</sub>, H- and T-Nb<sub>2</sub>O<sub>5</sub>.

| Materials                                          | Synthesis temperature (°C) | BET surface area (m <sup>2</sup> g <sup>-1</sup> ) |
|----------------------------------------------------|----------------------------|----------------------------------------------------|
| Nb <sub>1</sub> Mo <sub>0.1</sub> O <sub>2.8</sub> | 700                        | 3.8776                                             |
| T-Nb <sub>2</sub> O <sub>5</sub>                   | 700                        | 3.2083                                             |
| H-Nb <sub>2</sub> O <sub>5</sub>                   | 1000                       | 3.0724                                             |

Table S4. The performance comparison of half cell.

| Materials                                                        | Potential window<br>(V vs Li <sup>+</sup> /Li) | Capability (mA h g <sup>-1</sup> ) | Cycling life                                                                                | References       |
|------------------------------------------------------------------|------------------------------------------------|------------------------------------|---------------------------------------------------------------------------------------------|------------------|
| Micro-sized T-Nb <sub>2</sub> O <sub>5</sub>                     | 1.2-3.0                                        | 175 (0.1C)                         | ~100% retention after 100 cycles (1C)                                                       | [1]              |
| Micro-sized H-Nb <sub>2</sub> O <sub>5</sub>                     | 1.2-3.0                                        | ~225 (0.1C)                        | <80% retention after 100 cycles (0.1C)                                                      |                  |
| Micro-sized H-Nb <sub>2</sub> O <sub>5</sub>                     | 1.0-3.0                                        | ~250 (0.25C)                       | ~83% retention after 500 cycles (10C)                                                       | [2]              |
| Nano-sized Ti <sub>2</sub> Nb <sub>10</sub> O <sub>29-x</sub> @C | 1.0-2.5                                        | ~300 (1C)                          | 98.7% retention after 500 cycles (10C)                                                      | [3]              |
| Micro-sized TiNb <sub>2</sub> O <sub>7</sub>                     | 1.0-3.0                                        | ~350 (0.2C)                        | >90% retention after 1,000 cycles (1C)                                                      | [4]              |
| Micro-sized Nb <sub>14</sub> W <sub>3</sub> O <sub>44</sub>      | 1.0-3.0                                        | 221.3 (0.5C)                       | 96.5% retention after 4000 cycles (10C)                                                     | [5]              |
| Micro-sized Nb <sub>16</sub> W <sub>5</sub> O <sub>55</sub>      | 1.0-3.0                                        | ~250 (0.2C)                        | 95% retention after 250 cycles (10C)                                                        | [6]              |
| Nano-sized Cr <sub>0.5</sub> Nb <sub>24.5</sub> O <sub>62</sub>  | 0.5-3.0                                        | 344 (0.1C)                         | 92.8% retention after 1,000 cycles (10C)                                                    | [7]              |
| Nano-sized ZrNb <sub>24</sub> O <sub>62</sub>                    | 0.8-3.0                                        | 320 (0.1C)                         | 90.2% retention after 1,500 cycles (10C)                                                    | [8]              |
| Submicron-sized V <sub>3</sub> Nb <sub>17</sub> O <sub>50</sub>  | 0.8-3.0                                        | 254 (0.1C)                         | 91.8% retention over 2000 cycles (10C)                                                      | [9]              |
| <b>Micro-sized Nb<sub>1</sub>Mo<sub>0.1</sub>O<sub>2.8</sub></b> | <b>1.0-3.0</b>                                 | <b>362 (0.2C)</b>                  | <b>90.5% retention after 500 cycles (5C)</b><br><b>80% retention after 4000 cycles (5C)</b> | <b>This work</b> |



Table S5. Adsorption energies of Li atom labeled in Fig. S4 on the pure and Mo-doped H-Nb<sub>2</sub>O<sub>5</sub> phase. The 2<sup>nd</sup>, 3<sup>rd</sup>, 4<sup>th</sup> represents the adsorption energy of pure, Mo-doped H-Nb<sub>2</sub>O<sub>5</sub> phase and adsorption energy change between pure and Mo-doped H-Nb<sub>2</sub>O<sub>5</sub> phase.

| Label number | E <sub>ads-pure</sub> (eV) | E <sub>ads-Mo-doped</sub> (eV) | ΔE (E <sub>ads-pure</sub> -E <sub>ads-Mo-doped</sub> ) (eV) |
|--------------|----------------------------|--------------------------------|-------------------------------------------------------------|
| 1            | -2.64                      | -3.11                          | 0.47                                                        |
| 2            | -2.64                      | -3.01                          | 0.37                                                        |
| 3            | -2.90                      | -3.24                          | 0.34                                                        |
| 4            | -3.35                      | -3.54                          | 0.19                                                        |
| 5            | -3.29                      | -3.10                          | -0.19                                                       |
| 6            | -3.29                      | -3.58                          | 0.29                                                        |
| 7            | -3.66                      | -3.75                          | 0.09                                                        |
| 8            | -3.58                      | -3.66                          | 0.08                                                        |
| 9            | -3.60                      | -3.71                          | 0.11                                                        |
| 10           | -3.64                      | -3.75                          | 0.11                                                        |
| 11           | -3.28                      | -3.50                          | 0.22                                                        |
| 12           | -2.96                      | -3.17                          | 0.21                                                        |
| 13           | -3.62                      | -3.71                          | 0.09                                                        |
| 14           | -3.43                      | -3.57                          | 0.14                                                        |

Table S6. The performance comparison of full cell.

| Materials                                                                                                  | Voltage (V)    | Capability (mA h g <sup>-1</sup> ) | Cycling life                                                                                   | Reference        |
|------------------------------------------------------------------------------------------------------------|----------------|------------------------------------|------------------------------------------------------------------------------------------------|------------------|
| LiFePO <sub>4</sub> /Nb <sub>14</sub> W <sub>3</sub> O <sub>44</sub>                                       | 1.0-2.5        | 226.9(0.5C)                        | ~91.9% retention after 1000 cycles (10C)                                                       | [5]              |
| LiFePO <sub>4</sub> /Ti <sub>2</sub> Nb <sub>10</sub> O <sub>29</sub>                                      | 1.0-2.5        | ~240 (1C)                          | ~41.7% retention after 1000 cycles (C)                                                         | [10]             |
| LiNi <sub>0.5</sub> Mn <sub>1.5</sub> O <sub>4</sub> /Al <sub>0.5</sub> Nb <sub>24.5</sub> O <sub>62</sub> | 1.5-3.5        | ~175 (5C)                          | 89.2% retention after 800 cycles (5C)                                                          | [11]             |
| LiMn <sub>2</sub> O <sub>4</sub> /Cu <sub>2</sub> Nb <sub>34</sub> O <sub>87</sub>                         | 1.0-3.2        | 229 (0.1C)                         | 93.7% retention after 500 cycles (5C)                                                          | [12]             |
| LiMn <sub>2</sub> O <sub>4</sub> /V <sub>3</sub> Nb <sub>17</sub> O <sub>50</sub>                          | 1.0-3.2        | 195(0.1C)                          | 85.7% retention after 500 cycles (5C)                                                          | [9]              |
| <b>LiFePO<sub>4</sub>/Nb<sub>1</sub>Mo<sub>0.1</sub>O<sub>2.8</sub></b>                                    | <b>1.0-2.5</b> | <b>278 (0.2C)</b>                  | <b>~88.6% retention after 1000 cycles (5C)</b><br><b>~80% retention after 4000 cycles (5C)</b> | <b>This work</b> |

## References:

- [1] K. J. Griffith, A. C. Forse, J. M. Griffin, C. P. Grey, *J. Am. Chem. Soc.*, **2016**, 138, 8888-8899.
- [2] Z. Song, H. Li, W. Liu, H. Zhang, J. Yan, Y. Tang, J. Huang, H. Zhang, X. Li, *Adv. Mater.*, **2020**, 32, e2001001.
- [3] S. Deng, H. Zhu, G. Wang, M. Luo, S. Shen, C. Ai, L. Yang, S. Lin, Q. Zhang, L. Gu, B. Liu, Y. Zhang, Q. Liu, G. Pan, Q. Xiong, X. Wang, X. Xia, J. Tu, *Nat. Commun.*, **2020**, 11, 132.
- [4] K. J. Griffith, I. D. Seymour, M. A. Hope, M. M. Butala, L. K. Lamontagne, M. B. Preefer, C. P. Kocer, G. Henkelman, A. J. Morris, M. J. Cliffe, S. E. Dutton, C. P. Grey, *J. Am. Chem. Soc.*, **2019**, 141, 16706-16725.
- [5] Y. Yang, H. Zhu, J. Xiao, H. Geng, Y. Zhang, J. Zhao, G. Li, X.L. Wang, C. C. Li, Q. Liu, *Adv. Mater.*, **2020**, 32, e1905295.
- [6] K. J. Griffith, K. M. Wiaderek, G. Cibin, L. E. Marbella, C. P. Grey, *Nature*, **2018**, 559, 556-563.
- [7] C. Yang, S. Yu, C. Lin, F. Lv, S. Wu, Y. Yang, W. Wang, Z. Z. Zhu, J. Li, N. Wang, S. Guo, *ACS Nano*, **2017**, 11, 4217-4224.
- [8] C. Yang, Y. Zhang, F. Lv, C. Lin, Y. Liu, K. Wang, J. Feng, X. Wang, Y. Chen, J. Li, S. Guo, *J. Mater. Chem. A*, **2017**, 5, 22297-22304.
- [9] Q. Fu, X. Zhu, R. Li, G. Liang, L. Luo, Y. Chen, Y. Ding, C. Lin, K. Wang, X. S. Zhao, *Energy Storage Mater.*, **2020**, 30, 401-411.
- [10] Q. Cheng, J. Liang, Y. Zhu, L. Si, C. Guo, Y. Qian, *J. Mater. Chem. A*, **2014**, 2, 17258-17262.
- [11] Q. Fu, R. Li, X. Zhu, G. Liang, L. Luo, Y. Chen, C. Lin, X. S. Zhao, *J. Mater. Chem. A*, **2019**, 7, 19862-19871.
- [12] X. Zhu, G. Liang, Q. Fu, R. Li, Y. Chen, Y. Bi, D. Pan, R. Das, C. Lin, Z. Guo, *Chem. Commun.*, **2020**, 56, 7321-7324.
